# Supplementary material
Source: PubMed Central journal article supplement (PMC5038032)
Supplement: AEM.01669-16_zam999117419so1.pdf [file AEM.01669-16_zam999117419so1.pdf]

1  
2  
3  
4  
5  
6  
7  
8  
9  
10  
11  
12  
13  
14  
15  
16  
17  
18

**Characterization of cold atmospheric plasma inactivation of individual bacterial spores using Raman spectroscopy and phase contrast microscopy**

Shiwei Wang<sup>1,2</sup>, Christopher J. Doona<sup>3</sup>, Peter Setlow<sup>4</sup> and Yong-qing Li<sup>1,\*</sup>

<sup>1</sup>Department of Physics, East Carolina University, Greenville, North Carolina, USA, 27858-4353,

<sup>2</sup>State Key Laboratory of Microbial Resources, Institute of Microbiology, Chinese Academy of Sciences, Beijing, China, 100101, <sup>3</sup>U.S. Army—Natick Soldier RD&E Center, Natick, Massachusetts, USA and <sup>4</sup>Department of Molecular Biology and Biophysics, UConn Health, Farmington, Connecticut, USA, 06030-3305.

Key words: *Bacillus*; spores; cold atmospheric plasma decontamination; germination

Running title: Effects of plasma on bacterial spore properties

\*Corresponding author

Address: Department of Physics, East Carolina University, Greenville, North Carolina 27858-4353

Phone: 252-328-1858

Fax: 252-328-6314

Email: [liy@ecu.edu](mailto:liy@ecu.edu)

19 **Supplementary material**

20 FIG S1

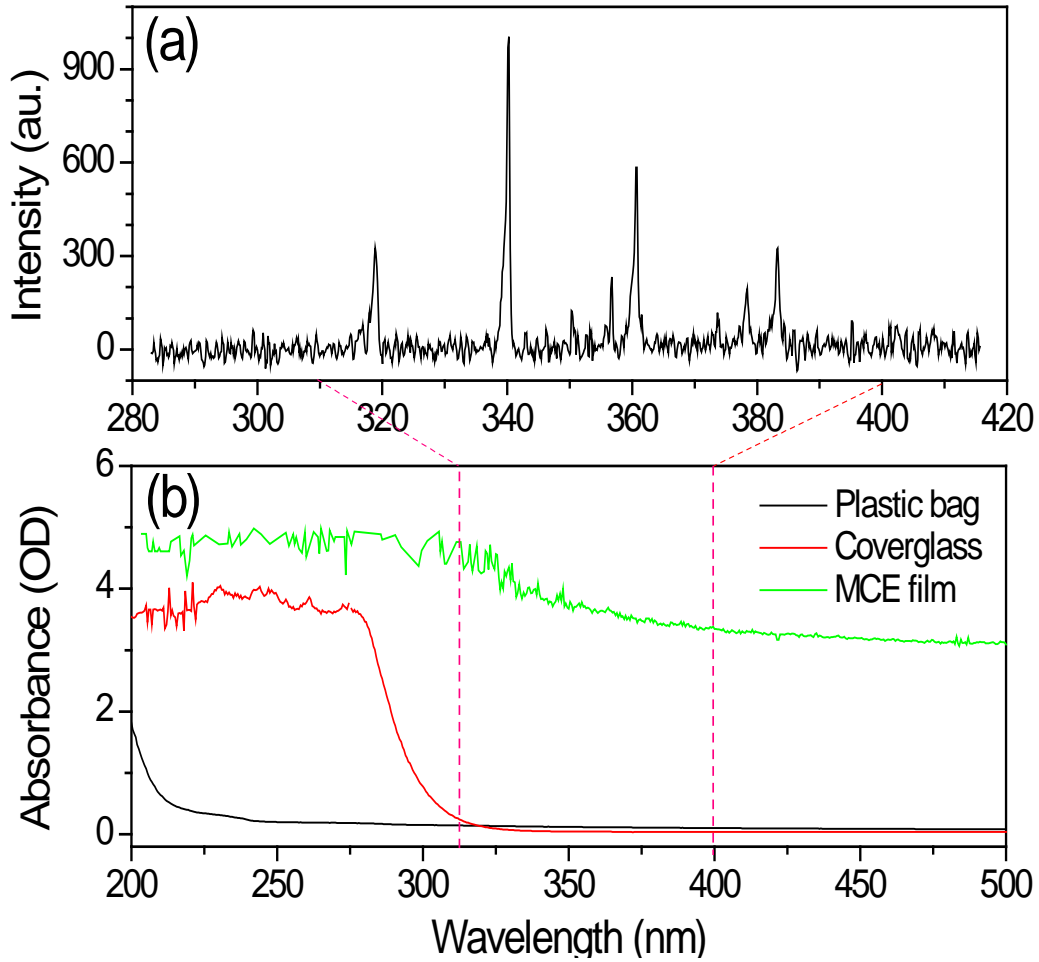

21

22 FIG S1 (a) Optical emission spectrum of CAP discharge (note UV-A radiation emitted). (b)

23 Absorbance spectra of different materials placed over spore samples. The plastic bag and cover-

24 glass are nearly transparent to UV-A light from 315-400 nm, and the MCE filter blocks UV-A

25 light.

26

27 FIG S2

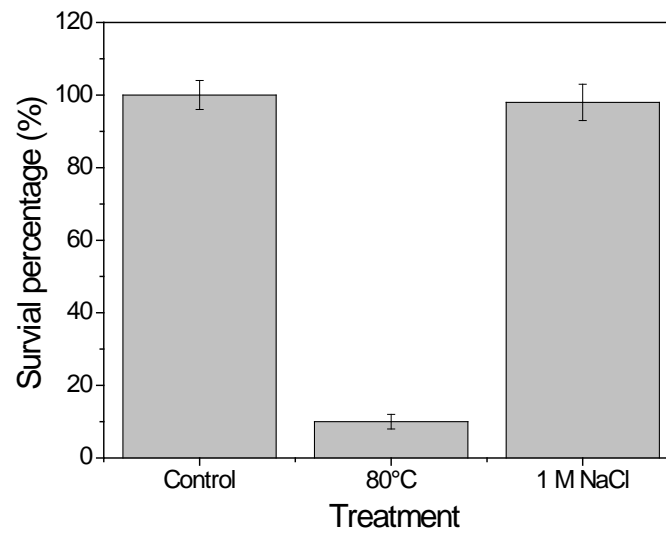

28

29 FIG S2 Changes in spore resistance properties after CAP treatment. After a 1 min CAP treatment  
30 of *B. subtilis* spores, spores were spread on LB medium plates without (Control) or with 1 M  
31 NaCl, and were heated at 80°C for 30 min and then spread on LB medium plates without 1 M  
32 NaCl.

33

34
